# Supplementary material for: Amorphous 3D nanoflake array-assembled porous 2D cobalt–oxalate coordination polymer thin sheets with excellent pseudocapacitive performance
Source: Royal Society of Chemistry journal article supplement (doi:10.1039/c4ta06160h), 2014-12-04
Supplement: c4ta06160h1.pdf [file c4ta06160h1.pdf]

## Supplementary information

# Amorphous 3D nanoflake array-assembled porous 2D cobalt-oxalate coordination polymer thin sheets with excellent pseudocapacitive performance

Lingyun Chen<sup>\*a,b</sup>, Qing Zhang<sup>a</sup>, Hong Xu<sup>a</sup>, Xiaohuan Hou<sup>a</sup>, Liying Xuan<sup>a</sup>, Yuqian Jiang<sup>a</sup> and Yuan Yuan<sup>a</sup>

<sup>a</sup> Department of Applied Chemistry, School of Chemistry and Chemical Engineering, Chongqing University, Chongqing 400044, China. E-mail: lychen@cqu.edu.cn

<sup>b</sup> State Key Laboratory of Coordination Chemistry, Nanjing University, Nanjing 210093, China

## Experimental

All chemicals used in our experiments were analytical grade and were used as received without further purification.

In a typical procedure, 0.001 mol cobalt (II) nitrate hexahydrate ( $\text{Co}(\text{NO}_3)_2 \cdot 6\text{H}_2\text{O}$ ) and 0.001 mol oxalic acid (OA) were added into 40 mL distilled water, followed by ultrasonics for 30 min. The resulting solution was transferred into a 50 mL of Teflon-lined autoclave, which was maintained at 200 °C for 24 h under electro-magnetic stirring for 500 rpm and then cooled to room temperature naturally. A pink colour product was collected by centrifuging and washed with water and absolute ethanol several times. Subsequently, these precipitates were frozen for 2 h followed by freeze-drying overnight for further characterizations. Such obtained product was designated as CQU-Co-OA-1-1.

Elemental analysis of CQU-Chen-OA-Co-1-1 ( $\text{C}_2\text{H}_4\text{O}_6\text{Co} = \text{Co}(\text{C}_2\text{O}_4)(\text{H}_2\text{O})_2$ ).

Calcd.: C, 13.13; H, 2.20; O, 52.46; Co, 32.21;

Found: C, 14.05; H, 2.19.

## Characterization

Element analysis was carried out on Exter Analytical CE440 element analysis equipment. The crystal structure of the products were characterized by powder X-ray diffraction (XRD, Bruker D8 Advance X-ray diffract meter) using nickel-filtered Cu K $\alpha$  radiation ( $\lambda = 1.5406 \text{ \AA}$ ). Fourier

transform infrared (FT-IR) spectra were recorded in the range 400-4000 cm<sup>-1</sup> on a Thermo Nicolet Magna IR 550II FT-IR spectrometer. The morphology and microstructures of the samples were investigated by field-emission scanning electron microscopy (SEM, HITACHI S-4800 electron microscopy) with energy-dispersive X-ray (EDX) spectra at an accelerating voltage of 20 kV. N<sub>2</sub> adsorption–desorption isotherms were performed on a Coulter SA-3100 analyzer apparatus with nitrogen as the analysis gas. Surface areas were calculated by the BET method and pore-size distribution was analyzed using the Barret–Joyner–Halenda (BJH) method. Thermogravimetric-differential thermal analysis (TGA-DTA) was carried out on a SHIMADZU DTG-60H simultaneous thermal analyzer.

### **Electrochemical measurements**

All the electrochemical experiments were carried out with a CHI 660E electrochemical workstation (Chenhua Corp., Shanghai, China). A three-electrode system was employed in all the electrochemical experiments.

The working electrode was made of as-prepared CQU-Chen-OA-Co-1-1 (80 wt %), acetylene black (15 wt %) and polytetrafluoroethylene (PTFE) binder (5 wt %). After grinding, the mixed materials were pasted onto a piece of nickel foam under a pressure of 5.0 MPa and dried under vacuum at 60 °C for 12 h. Platinum wire and standard calomel electrode (SCE) were used as the counter and reference electrodes, respectively.

### **Electrochemical calculations**

(1) Specific capacitances derived from charge–discharge tests can be calculated from the following equation:

$$C = \frac{I \times \Delta t}{m \times \Delta V} \quad (1)$$

where C (F g<sup>-1</sup>) is the specific capacitance of the electrode based on the mass of active materials, I (A) is the current during discharge process, Δt (s) is the discharge time, ΔV (V) is the potential window (here ΔV = 0.5 V), m (g) is the mass of active materials.

(2) Energy density and power density derived from charge–discharge tests can be calculated from the following equations:

$$E = \frac{1}{2} CV^2 \quad (2)$$

$$P = \frac{E}{t} \quad \text{③}$$

where E (Wh kg<sup>-1</sup>) is the average energy density; C (F g<sup>-1</sup>) is the specific capacitance; V (V) is the potential window (here  $\Delta V = 1.5$  V); P (W kg<sup>-1</sup>) is the average power density and t (s) is the discharge time.

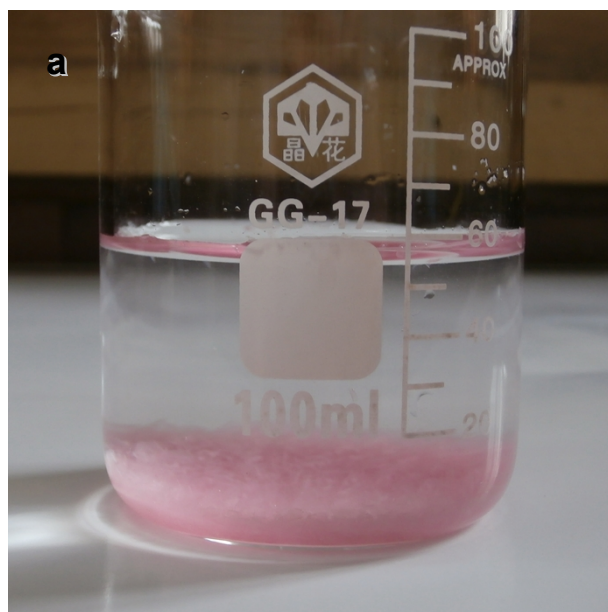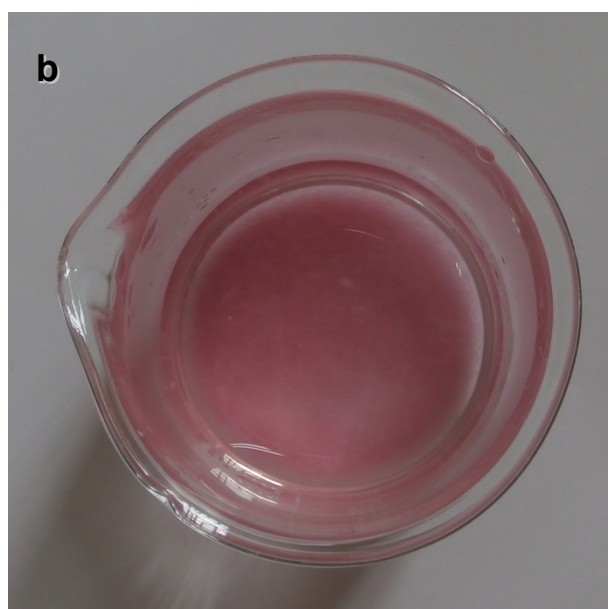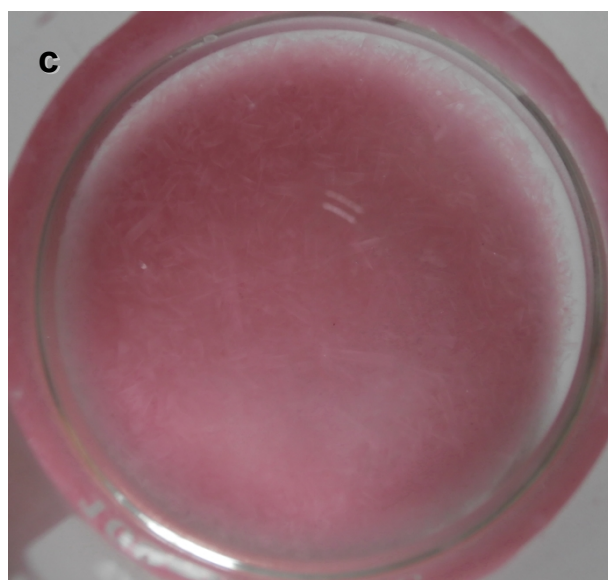

**Fig. S1** (a)-(c) Digital photography of the CQU-Chen-Co-OA-1-1 (a) and (b) in 100 ml beaker after hydrothermal reaction at 200°C for 24 h.

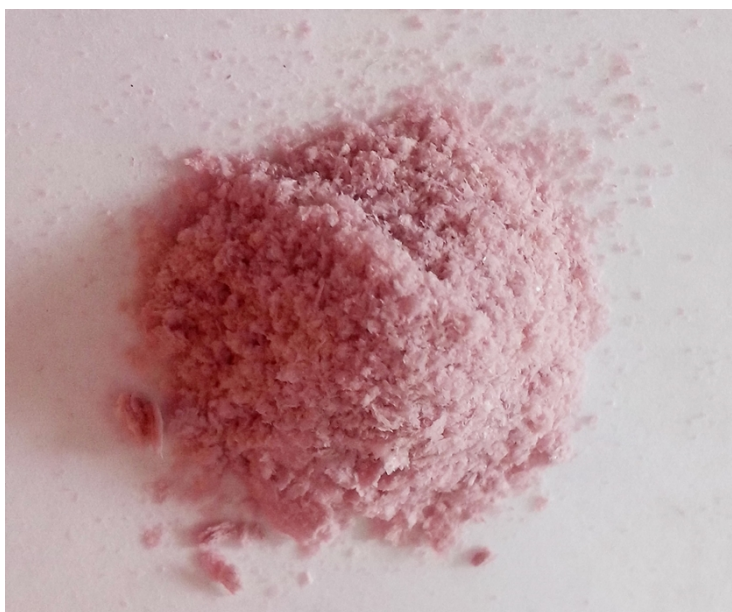

Fig. S2 Digital photography of the CQU-Chen-Co-OA-1-1 after freeze-drying.

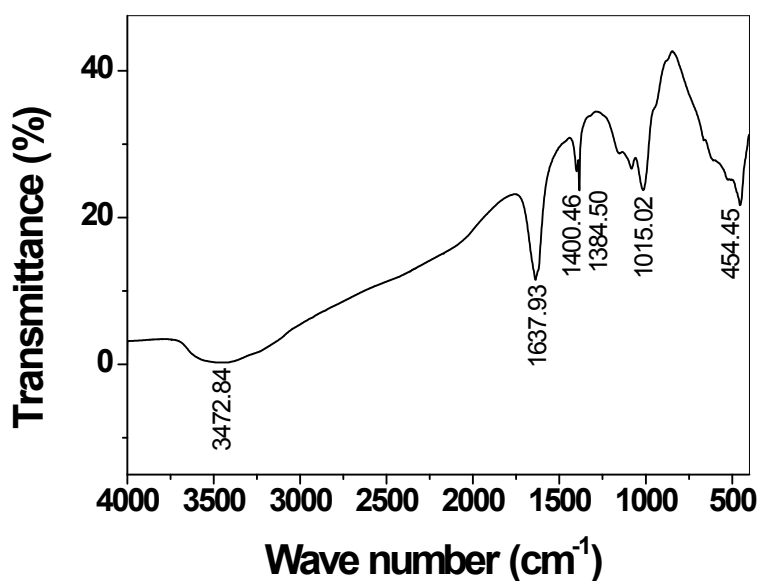

Fig. S3 Fourier transforms infrared spectra (FT-IR) of the CQU-Chen-Co-OA-1-1.

**FT-IR analysis:** The FT-IR spectrum of CQU-Chen-OA-Co-1-1 in Fig. S3) shows the broad band above 3400 (between 3100 and 3600)  $\text{cm}^{-1}$  which is attributed to asymmetric and symmetric stretching of  $\text{OH}^-$  and the absorbed  $\text{H}_2\text{O}$  molecule. This band is related to moisture in the sample. And the absorbed  $\text{H}_2\text{O}$  bending vibration also appears at  $1400 \text{ cm}^{-1}$ . The stretching band of carbonyl group  $\nu(\text{C}=\text{O})$  at  $1638 \text{ cm}^{-1}$ , the stretching band of C–O bond  $\nu(\text{C}–\text{O})$  at  $1385 \text{ cm}^{-1}$ , the O–C=O out of plane bending mode  $\delta(\text{O}–\text{C}=\text{O})$  of oxalate at  $776 \text{ cm}^{-1}$  and

the O–C=O in-plane bending mode  $\delta(\text{O–C=O})$  at  $510\text{ cm}^{-1}$ . And the frequencies of Co–O bonds  $\nu(\text{Co–O})$  can be seen at  $454\text{ cm}^{-1}$ .

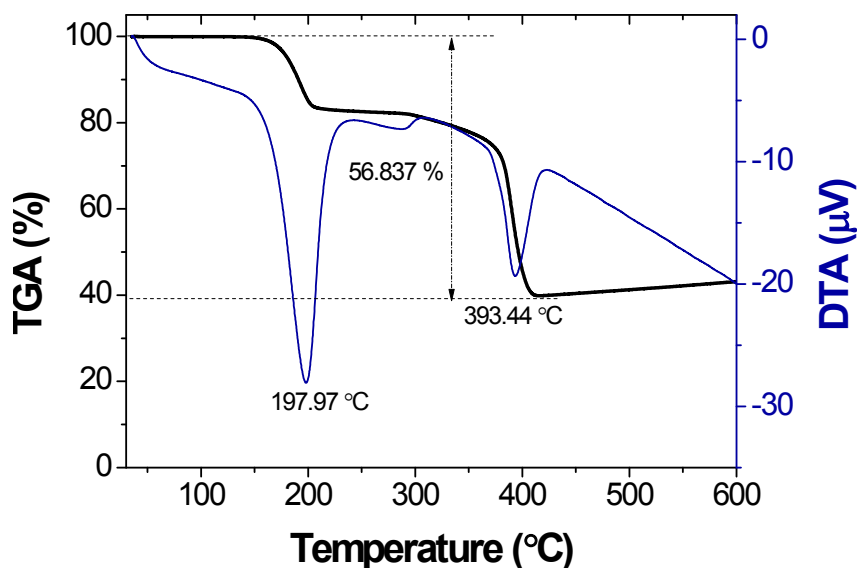

**Fig. S4** Thermogravimetric-differential thermal analysis (TGA-DTA) curves of the CQU-Chen-Co-OA-1-1 in the range between room temperature (25 °C) and 600 °C with Air flow rate of 100 mL/min at a heating rate of 10°C/min in air atmosphere.

**TGA-DTA analysis:** The thermal behaviour of the CQU-Chen-OA-Co-1-1 has been examined using thermogravimetric-differential thermal analysis (TGA-DTA) in Fig. S4. It seems that the decomposition proceeds in two stages. The first 20.76 % weigh loss exhibited a weight change below 200 °C associated with the dehydration of crystal water, and the second 36.08 % weigh loss seems to be related to the greater decomposition step above 400 °C corresponds to the decomposition of  $\text{C}_2\text{O}_4^{2-}$  anion degradation with CO and  $\text{CO}_2$  evolution due to the chemical reaction between  $[\text{Co}(\text{C}_2\text{O}_4)]$  and  $\text{O}_2$ . The relatively high thermal decomposition temperature shows that CQU-Chen-OA-Co-1-1 has good thermal stability properties.

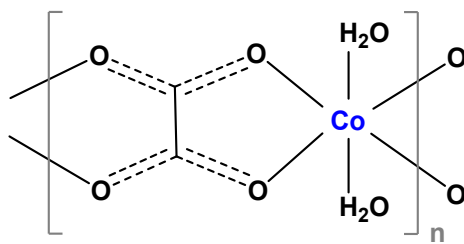

**Fig. S5** The structure of the  $[\text{Co}(\mu\text{-ox})(\text{H}_2\text{O})_2]_n$  CPs.

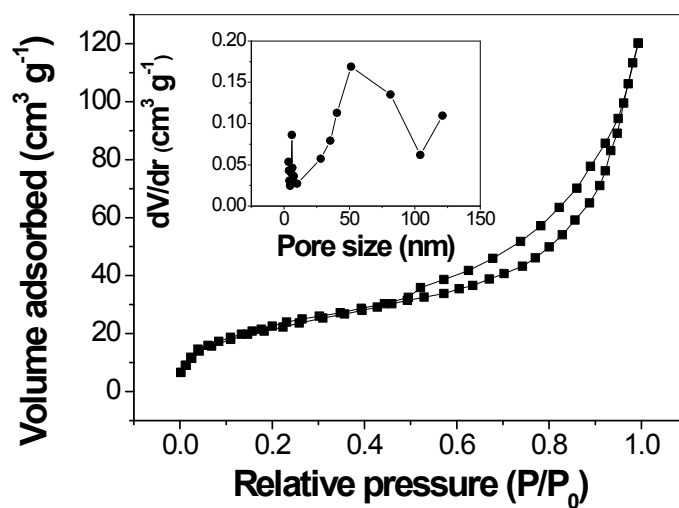

**Fig. S6**  $\text{N}_2$  adsorption/desorption isotherms and the pore-size distribution plot of the CQU-Chen-OA-Co-1-1.
